# Supplementary material
Source: PubMed Central journal article supplement (PMC3193584)
Supplement: NIHMS299753-supplement-supplement_1.pdf [file NIHMS299753-supplement-supplement_1.pdf]

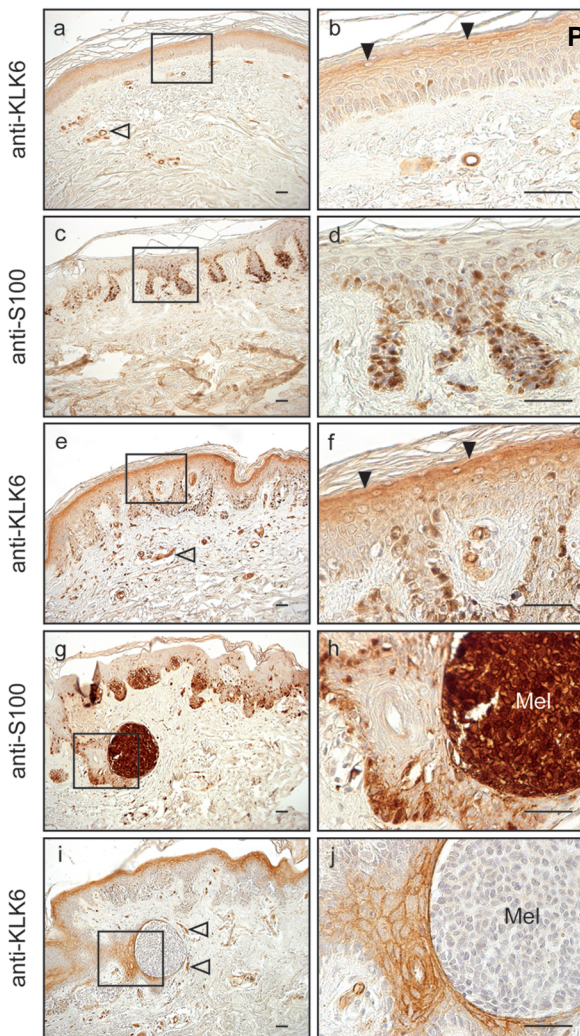

**Supplemental Figure S1. KLK6 protein expression in human melanoma.** IHC analysis with tissue sections from unaffected skin (a-b), dysplastic nevi (c-f) and primary melanoma (g-j) was performed with an anti-KLK6 antibody and revealed specific staining (brown signal) in epidermal keratinocytes (black arrowheads) and blood vessels (open arrowheads). Right panels show a higher magnification of areas marked by black boxes. Staining with an anti-S100 antibody was used as a control to detect transformed melanoma cells (c-d, g-h). Sections were counterstained with hematoxylin. Scale bars, 40  $\mu$ m. Mel, Melanoma.

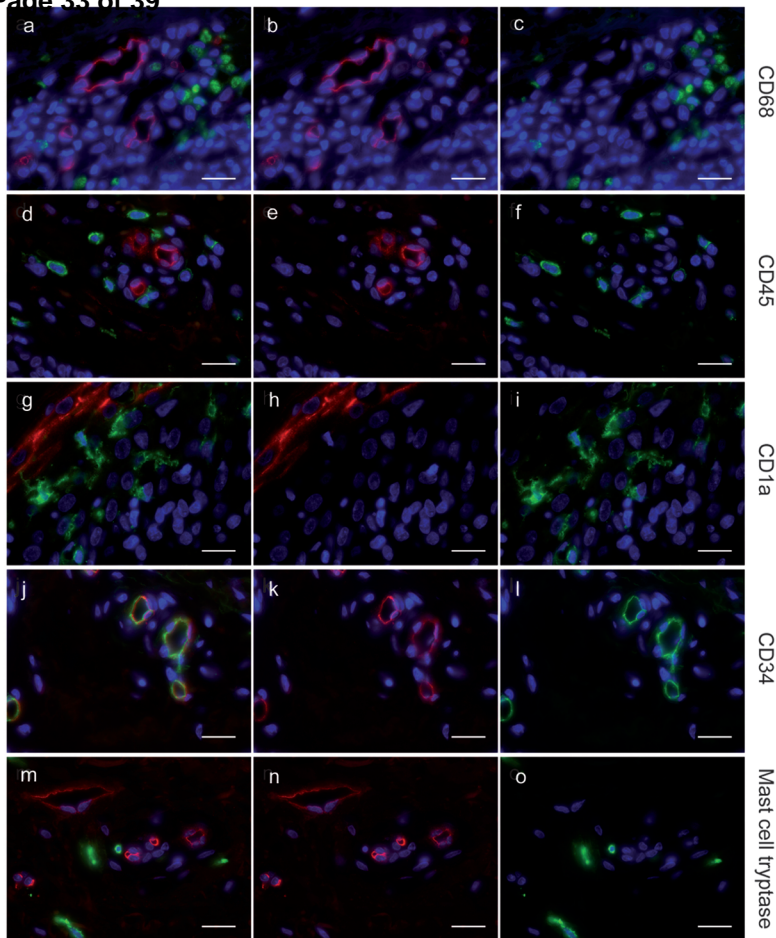

**Supplemental Figure S2. KLK6 protein expression in endothelial cells of human melanoma.** Co-immunofluorescence analysis with tissue section from primary melanoma were performed using anti-KLK6 antibody (b, e, h, k, n, red staining), anti-CD68 antibody (c, green staining), anti-CD45 (f, green staining), anti-CD1a (i, green staining), anti-CD34 (l, green staining), and anti-Mast cell tryptase (o, green staining). Left panels show the merge of the co-staining. Scale bars, 40  $\mu$ m.

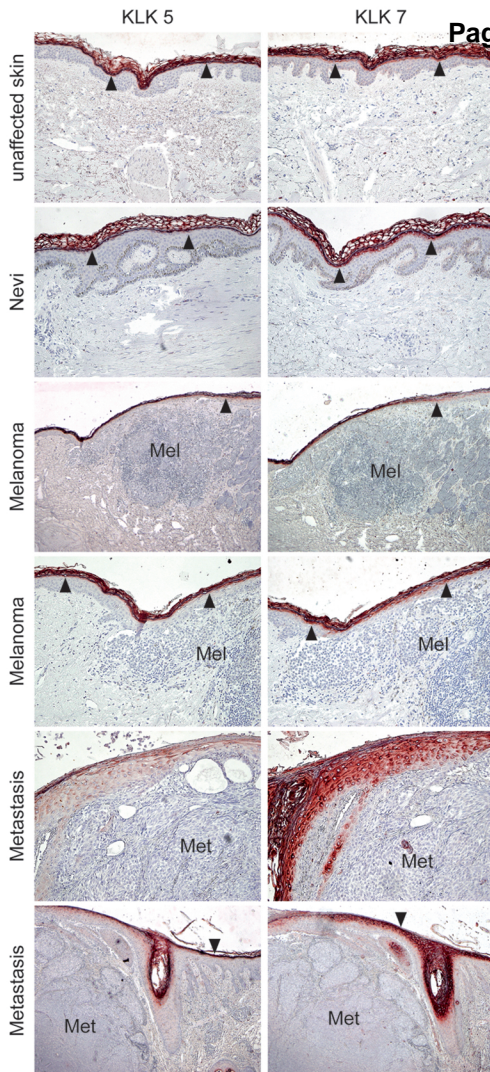

**Supplemental Figure S3. KLK5 and KLK7 protein expression in epidermal keratinocytes of human melanoma tissue sections.** IHC analysis with tissue sections of unaffected skin, dysplastic nevi, primary melanoma, and epidermotropic metastasis was performed with antibodies raised against KLK5 and KLK7 proteins and revealed specific staining (red signal) mainly in terminally differentiated epidermal keratinocytes (black arrowheads). Sections were counterstained with hematoxylin. Scale bars, 40  $\mu$ m. Mel, Melanoma and Met, Metastasis.

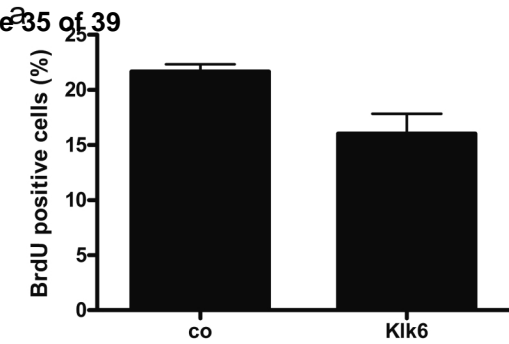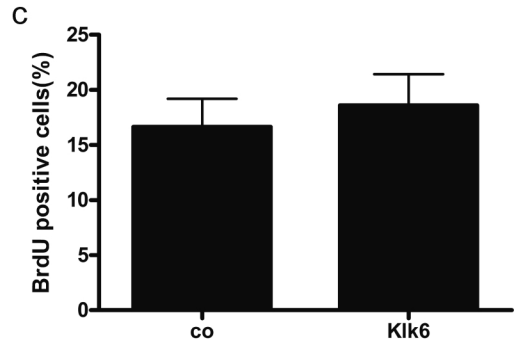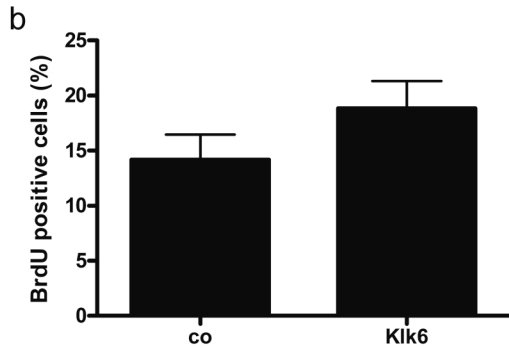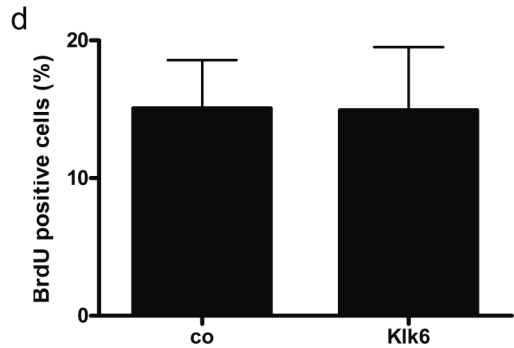

**Supplemental Figure S4. Measurement of BrdU positive cells.** Cells were seeded in a 12-well plate and stimulated for 4 (a, c) and 8 hours (b, d) with 40 nM recombinant rat Klk6 and BrdU incorporation was quantified by FACS analysis. BrdU incorporation of MeWo cells (a, b) and Skmel23 cells (c, d) were quantified in the absence (control) and presence (Klk6) of 40 nM recombinant rat Klk6.



**Supplemental Table S1: Summary of the patient characteristics**

| Probe No. | Age | Sex | Type            | Classification | Location   | Progress |
|-----------|-----|-----|-----------------|----------------|------------|----------|
| 572/07B   | 49  | m   | SSM             | AJCC IA        | Chest      | no       |
| 1079/06C  | 72  | m   | ulc. amelan. MM | AJCC IIC       | Lower leg  | yes      |
| 1973/06C  | 56  | m   | SSM             | AJCC IA        | Back       | no       |
| 2703/06D  | 88  | m   | SSM             | AJCC IIC       | Back       | -        |
| 2737/06C  | 55  | f   | SSM             | AJCC IB        | Lower leg  | no       |
| 3672/06A  | 52  | f   | SSM             | AJCC IA        | Lower leg  | no       |
| 388/07B   | 75  | m   | SSM             | AJCC IB        | Chest      | no       |
| 339/07C   | 69  | m   | ulc. SSM        | AJCC IIB       | Back       | yes      |
| 573/07B   | 49  | m   | SSM             | -              | -          | no       |
| 666/07L   | 58  | f   | ulc. ALM        | AJCC IIC       | Ankl joint | yes      |
| 905/07    | 72  | m   | SSM             | AJCC IA        | Shoulder   | yes      |

*SSM: Superficial spreading melanoma, ALM: Acral lentiginous melanoma, ulc: ulceration*  
*AJCC: American Joint Committee on Cancer Staging System for Cutaneous Melanoma*  
*m: male, f: female*

**Supplemental Table S2: Summary of the antibodies used in the study**

| <b>Name</b>                         | <b>Number</b> | <b>Assay</b>  | <b>Antigen</b>     | <b>Company</b>                           | <b>Dilution</b> |
|-------------------------------------|---------------|---------------|--------------------|------------------------------------------|-----------------|
| anti-human KLK5                     | AF1108        | IHC           | KLK5               | R&D systems, Minneapolis, USA            | 1:200           |
| anit-human KLK6                     | AF2008        | IHC           | KLK6               | R&D systems, Minneapolis, USA            | 1:100           |
| anti-human KLK7                     | AF2624        | IHC           | KLK7               | R&D systems, Minneapolis, USA            | 1:200           |
| anti-human S100                     | SI691R06      | IHC           | S-100              | DCS, Hamburg, Germany                    | ready to use    |
| biotinylated horse-anti-mouse IgG   | BA-2000       | IHC           |                    | Vector, Burlingame, CA                   | 1:200           |
| biotinylated horse-anti-goat IgG    | BA-9500       | IHC           |                    | Vector, Burlingame, CA                   | 1:200           |
| anti-human PAR-1                    | sc-13503      | Western Blot  | PAR-1              | Santa Cruz Biotechnology, Santa Cruz, CA | 1:500           |
| anti-human $\beta$ -actin           | sc-1615       | Western Blot  | $\beta$ -actin     | Santa Cruz Biotechnology, Santa Cruz, CA | 1:2000          |
| anti-goat IgG, HRP-linked antibody  | sc-2020       | Western Blot  |                    | Santa Cruz Biotechnology, Santa Cruz, CA | 1:5000          |
| anti-mouse IgG, HRP-linked antibody | #7076         | Western Blot  |                    | Cell Signaling Technology, Boston, USA   | 1:2000          |
| anti human PAR-1                    | AF3855        | FACS analysis | PAR-1              | R&D systems, Minneapolis, USA            | 2.5 $\mu$ g/ml  |
| anti-goat Alexa 488                 | A11055        | FACS analysis |                    | Invitrogen, Karlsruhe, Germany           | 1:200           |
| anti-human CD45                     | M0701         | IF            | CD45               | Dako Cytomation                          | 1:100           |
| anti-human mast cell tryptase       | M7052         | IF            | mast cell tryptase | Dako Cytomation                          | 1:100           |
| anti-human CD34                     | NCL-END       | IF            | CD34               | Novocastra Laboratories                  | 1:50            |
| anti-human CD1a                     | M3571         | IF            | CD1a               | Dako Cytomation                          | 1:50            |
| anti-human CD68                     | M0876         | IF            | CD68               | Dako Cytomation                          | 1:100           |

**Supplemental Table S3: shRNA against human PAR-1 cloned into the lentivirus vector pLKO.1-puro were purchased from Sigma Aldrich**

| <b>Name</b> | <b>Sequence 5'-3' and region targeted by the shRNA</b>                                                         |
|-------------|----------------------------------------------------------------------------------------------------------------|
| shRNA 1349  | CCGGGCATTACTCATTCTTTCTCACTCGAGTGAGAAAGGAATGAGTAATGCTTTTT<br><br>Region: CDS                                    |
| shRNA 2152  | alternate species: NM_001992.2<br>CCGGGACGGCAAGGTTTAAGTTATTCTCGAGAATAACTTAAACCTTGCCGTCTTTTT<br><br>Region: CDS |
| co shRNA    | alternate species: NM_001992.2<br>catalogue number: SHC002V                                                    |

**Supplemental Table S4: Summary of primers used for qRT-PCR**

| <b>Primer name</b> | <b>Sequence</b>                          |
|--------------------|------------------------------------------|
| h Lamin b1 for     | 5'- GCT GCT CCT CAA CTA TGC TAA GAA - 3' |
| h Lamin b1 rev     | 5'- TTT GAC GCC CAG AAT CCA C -3'        |
| h PAR-1 for        | 5'- GGC CCG CAG GCC AGA ATC AA -3'       |
| h PAR-1 rev        | 5'- AGT GTC AGC CAG GAG CTG GTC A -3'    |
